# Supplementary material for: A strong host response and lack of MYC expression are characteristic for diffuse large B cell lymphoma transformed from nodular lymphocyte predominant Hodgkin lymphoma
Source: PubMed Central journal article supplement (PMC5342154; doi:10.18632/oncotarget.12363), 2016-09-30
Supplement: oncotarget-07-72197-s001.pdf [file oncotarget-07-72197-s001.pdf]

## A strong host response and lack of MYC expression are characteristic for diffuse large B cell lymphoma transformed from nodular lymphocyte predominant Hodgkin lymphoma

### SUPPLEMENTARY FIGURES AND TABLES

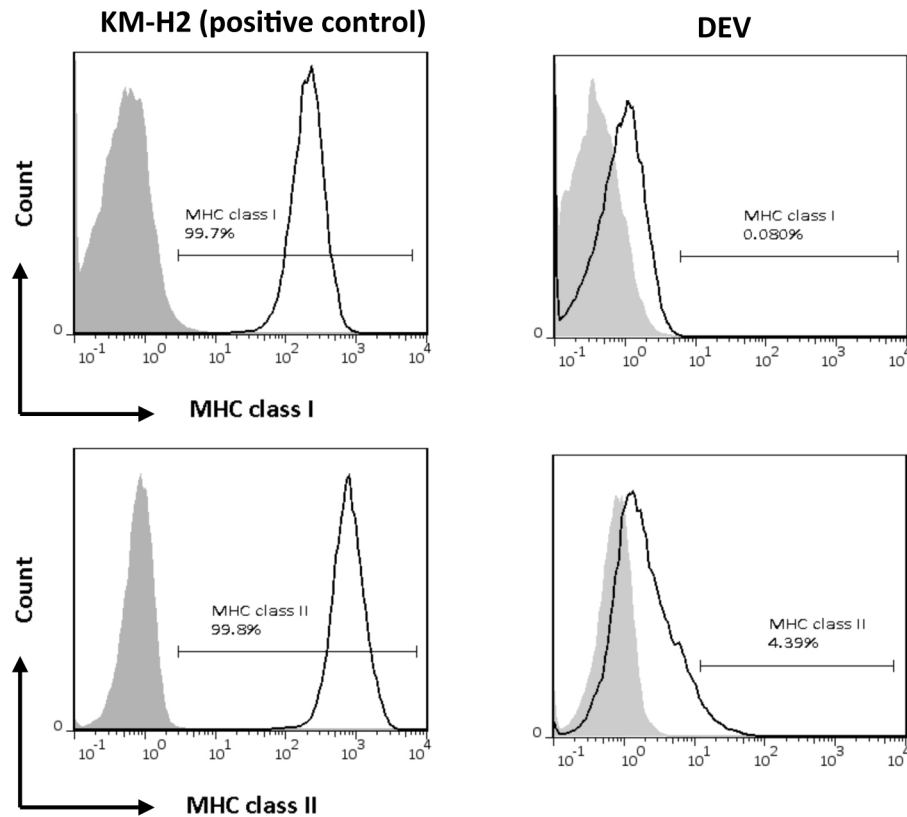

**Supplementary Figure S1: MHC-Expression Histogram.** Lack of MHC class I and -class II expression in DEV cells and presence on the surface of KM-H2 cells. Flow cytometry analysis of MHC class I (upper panel) and MHC class II (lower panel) in KM-H2 cHL cells and DEV cells showing unstained cells (grey histogram) compared to cells stained for MHC class I or -class II (white histogram with solid black line).

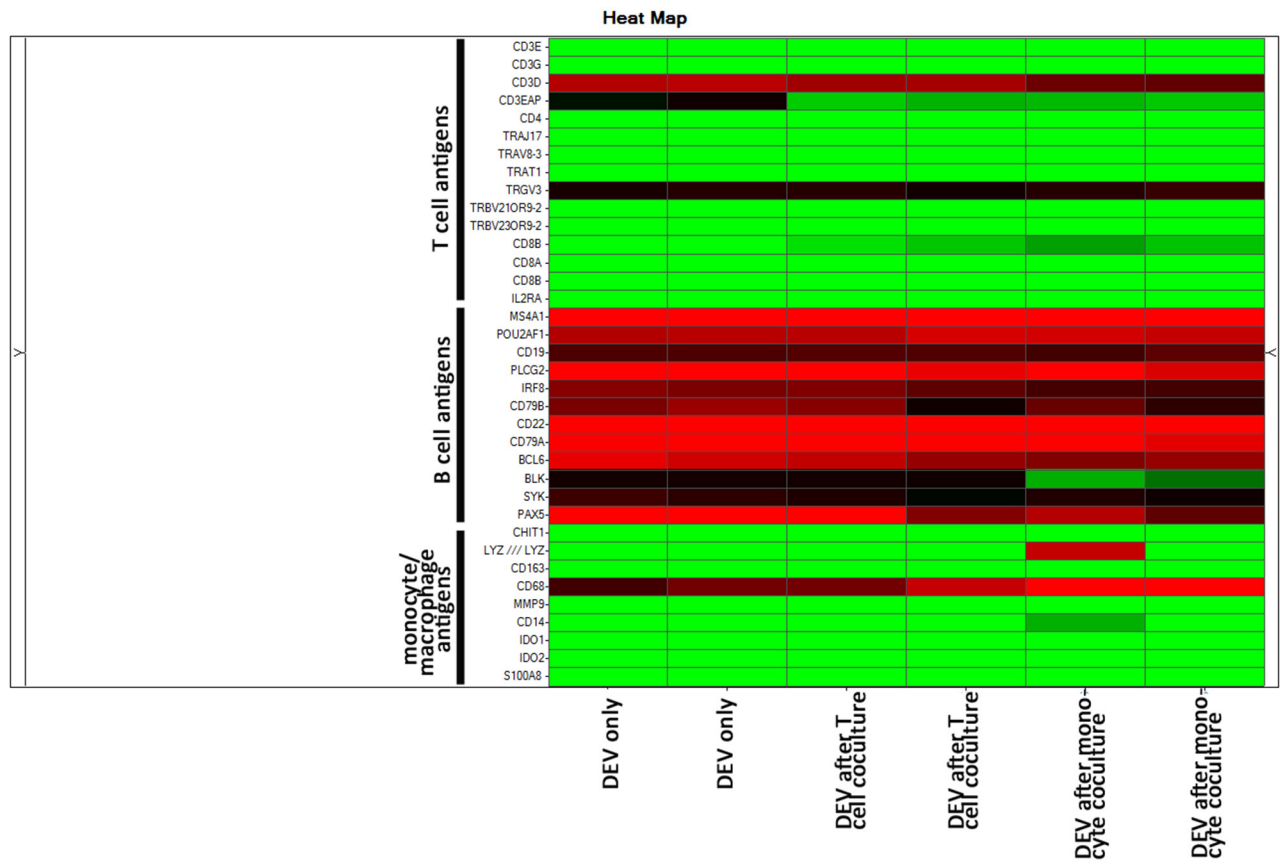

Supplementary Figure S2: Expression of T cell, B cell and monocyte/macrophage antigens in DEV cells and DEV cells after coculture with T cells and monocytes.

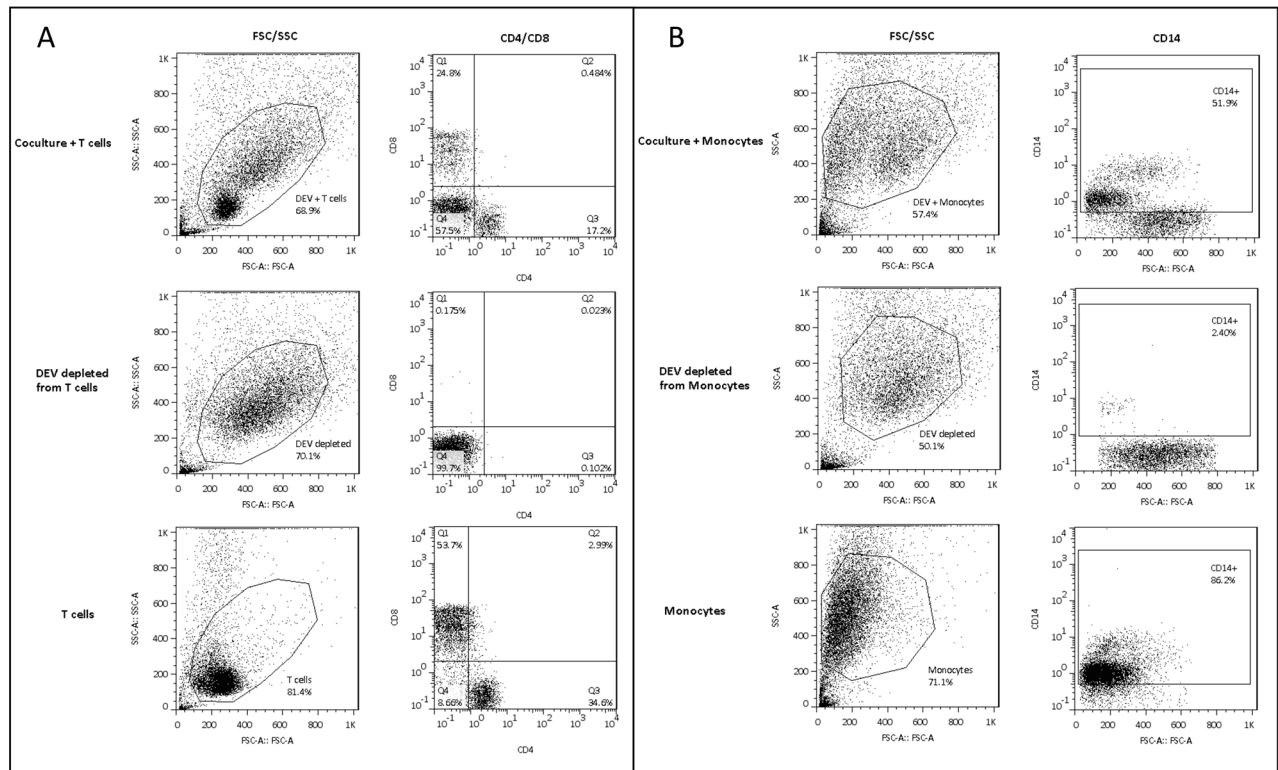

**Supplementary Figure S3: DEV cells in coculture, after depletion of bystander cells, and depleted fraction. A.** Coculture with T cells **B.** Coculture with monocytes. Efficient depletion of T cells (A) or monocytes (B) from cocultures with DEV cells by MACS. Flow cytometry analysis of CD4- and CD8-positive T cells or CD14-positive monocytes in coculture with DEV cells (upper panel), DEV cells purified from T cells or monocytes (middle panel) and T cell- or monocyte fractions depleted from cocultures (lower panel).

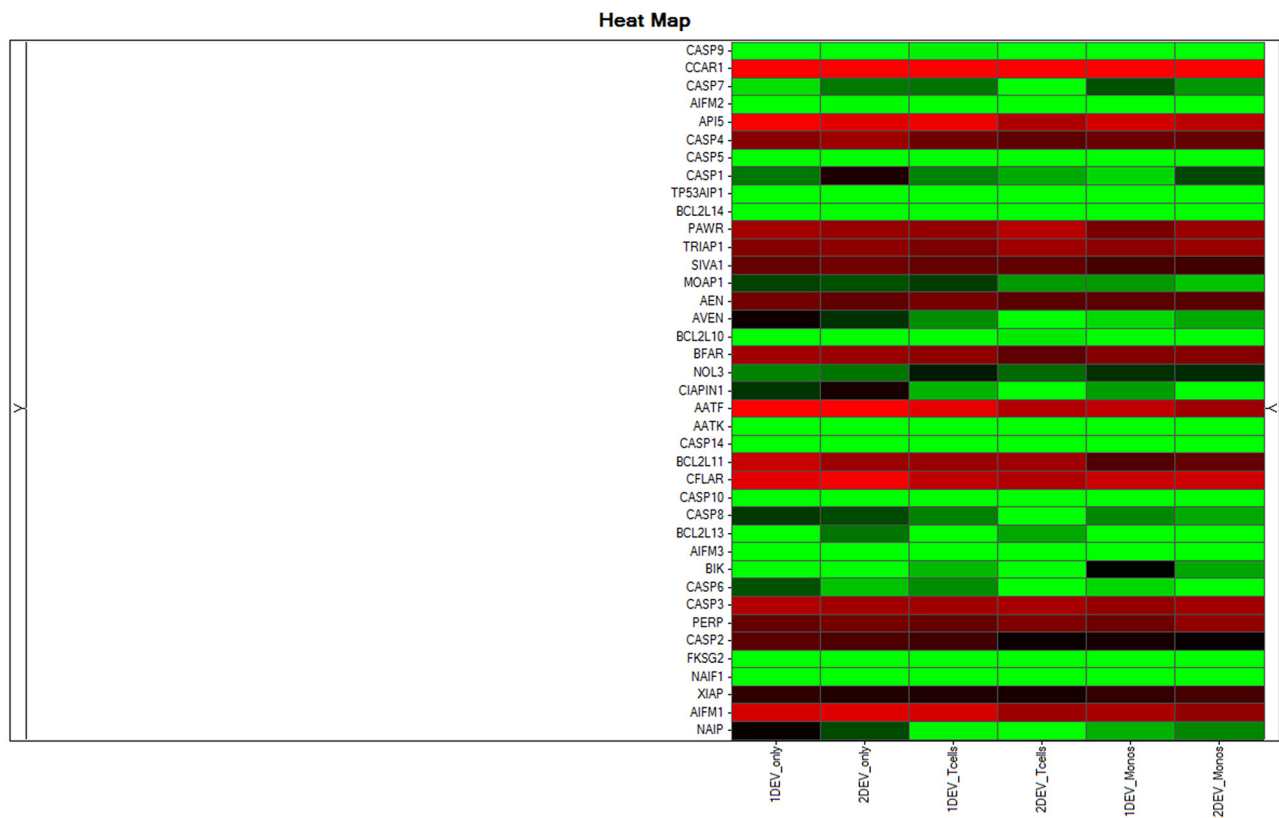

**Supplementary Figure S4: Expression of apoptosis-related genes in DEV cells and DEV cells after coculture with T cells or monocytes.**

**Supplementary Table S1: Clinical features of LP-DLBCL and conventional DLBCL cases investigated by gene expression profiling**

|                     | Male gender (%) | Mean age (Range) | Simultaneous diagnosis of NLPHL + DLBCL (%) | Average time (years) to transformation in cases with sequential transformation: mean (Range) |
|---------------------|-----------------|------------------|---------------------------------------------|----------------------------------------------------------------------------------------------|
| LP-DLBCL (n=9)      | 9 (100%)        | 54 (23-78)       | 6 (67%)                                     | 10 (2-21)                                                                                    |
| GCB-DLBCL (n=11)    | 7 (64%)         | 55 (17-85)       | -                                           | -                                                                                            |
| Non-GCB DLBCL (n=9) | 5 (56%)         | 64 (37-88)       | -                                           | -                                                                                            |

Supplementary Table S2: Top 20 transcripts upregulated in DEV cells after coculture with T cells or monocytes

| Fold change | p-value     | FDR         | Gene Symbol     | Gene Description                                                                  |
|-------------|-------------|-------------|-----------------|-----------------------------------------------------------------------------------|
| 5.3         | 0.000672643 | 0.044019241 | <i>HSN2</i>     | hereditary sensory neuropathy, type II                                            |
| 5.3         | 0.017829845 | 0.062068374 | <i>RAB3A</i>    | RAB3A, member RAS oncogene family                                                 |
| 4.5         | 0.015681032 | 0.059258768 | <i>FABP3</i>    | fatty acid binding protein 3, muscle and heart (mammary-derived growth inhibitor) |
| 3.7         | 0.01138228  | 0.056876836 | <i>RRAGD</i>    | Ras-related GTP binding D                                                         |
| 3.6         | 0.008962452 | 0.054572689 | <i>NPC2</i>     | Niemann-Pick disease, type C2                                                     |
| 3.5         | 0.003636499 | 0.052451694 | <i>LY9</i>      | lymphocyte antigen 9                                                              |
| 3.4         | 0.033598833 | 0.080895651 | <i>NR1D1</i>    | nuclear receptor subfamily 1, group D, member 1                                   |
| 3.2         | 0.007026364 | 0.05271875  | <i>FLJ38723</i> | hypothetical FLJ38723                                                             |
| 3.1         | 0.011710716 | 0.057119147 | <i>SNORD3A</i>  | small nucleolar RNA, C/D box 3A                                                   |
| 2.9         | 0.008426189 | 0.053305829 | <i>ABHD4</i>    | abhydrolase domain containing 4                                                   |
| 2.9         | 0.001225376 | 0.049753082 | <i>RGS1</i>     | regulator of G-protein signaling 1                                                |
| 2.8         | 0.006621671 | 0.052451694 | <i>CLEC2B</i>   | C-type lectin domain family 2, member B                                           |
| 2.7         | 0.001833629 | 0.051676393 | <i>GM2A</i>     | GM2 ganglioside activator                                                         |
| 2.7         | 0.016274548 | 0.05984063  | <i>LICAM</i>    | L1 cell adhesion molecule                                                         |
| 2.6         | 0.000891309 | 0.045529244 | <i>TEC</i>      | tec protein tyrosine kinase                                                       |
| 2.6         | 0.014115387 | 0.059258768 | <i>DDIT3</i>    | DNA-damage-inducible transcript 3                                                 |
| 2.6         | 0.002187248 | 0.051676393 | <i>C3orf37</i>  | chromosome 3 open reading frame 37                                                |
| 2.6         | 0.019910142 | 0.06391666  | <i>LCP2</i>     | lymphocyte cytosolic protein 2 (SH2 domain containing leukocyte protein of 76kDa) |
| 2.6         | 0.009492806 | 0.055012047 | <i>CDK2</i>     | cyclin-dependent kinase 2                                                         |
| 2.6         | 0.025536307 | 0.070811641 | <i>MGC16384</i> | hypothetical LOC114130                                                            |

FDR, false discovery rate

Supplementary Table S3: Top 20 transcripts downregulated in DEV cells after coculture with T cells or monocytes

| Fold change | p-value     | FDR         | Gene Symbol          | Gene Description                                      |
|-------------|-------------|-------------|----------------------|-------------------------------------------------------|
| -8.4        | 0.012608853 | 0.058327178 | <i>MYC</i>           | v-myc myelocytomatosis viral oncogene homolog (avian) |
| -5.9        | 0.000478582 | 0.044019241 | <i>MIR155</i>        | microRNA 155                                          |
| -4.7        | 0.005841808 | 0.052451694 | <i>P2RY14</i>        | purinergic receptor P2Y, G-protein coupled, 14        |
| -4.4        | 0.013080596 | 0.059258768 | <i>ACTG2</i>         | actin, gamma 2, smooth muscle, enteric                |
| -4.0        | 0.009958711 | 0.0551286   | <i>TLR10</i>         | toll-like receptor 10                                 |
| -3.8        | 0.025376177 | 0.070811641 | <i>UGT2B7</i>        | UDP glucuronosyltransferase 2 family, polypeptide B7  |
| -3.4        | 0.013699511 | 0.059258768 | <i>FKBP5</i>         | FK506 binding protein 5                               |
| -3.4        | 0.005210678 | 0.052451694 | <i>FAM111B</i>       | family with sequence similarity 111, member B         |
| -3.4        | 0.007927227 | 0.05271875  | <i>HNRNPM</i>        | heterogeneous nuclear ribonucleoprotein M             |
| -3.4        | 0.037738098 | 0.084978594 | <i>RUVBL1</i>        | RuvB-like 1 (E. coli)                                 |
| -3.2        | 0.000124404 | 0.030982853 | <i>MAT2A</i>         | methionine adenosyltransferase II, alpha              |
| -3.1        | 0.000755921 | 0.044019241 | <i>NOP58</i>         | NOP58 ribonucleoprotein homolog (yeast)               |
| -3.0        | 0.014662792 | 0.059258768 | <i>FUS</i>           | fused in sarcoma                                      |
| -3.0        | 0.006827164 | 0.052451694 | <i>SFRS7</i>         | splicing factor, arginine/serine-rich 7, 35kDa        |
| -2.9        | 0.02628985  | 0.071788205 | <i>AIM2</i>          | absent in melanoma 2                                  |
| -2.9        | 0.026732974 | 0.072258332 | <i>NOP16</i>         | NOP16 nucleolar protein homolog (yeast)               |
| -2.9        | 0.002053548 | 0.051676393 | <i>DKFZp434H1419</i> | hypothetical protein DKFZp434H1419                    |
| -2.8        | 0.001905462 | 0.051676393 | <i>SAMD9L</i>        | sterile alpha motif domain containing 9-like          |
| -2.8        | 0.004897793 | 0.052451694 | <i>EBNA1BP2</i>      | EBNA1 binding protein 2                               |
| -2.7        | 0.002617768 | 0.051676393 | <i>TIPIN</i>         | TIMELESS interacting protein                          |

FDR, false discovery rate

**Supplementary Table S4: Antibodies, providers and dilutions used for immunohistochemistry (IHC) or Western Blot (WB)**

| Application | Antibody        | Clone             | Provider                                           | Dilution     | Order Number |
|-------------|-----------------|-------------------|----------------------------------------------------|--------------|--------------|
| IHC         | CD3             | Rabbit polyclonal | Dako, Glostrup, Denmark                            | 1:200        | A0452        |
| IHC         | CD20            | L26               | Dako                                               | 1:1000       | M0755        |
| IHC         | p-STAT1         | ST1P-11A5         | Thermo Fisher, Rockford, IL, USA                   | 1:100        | 333400       |
| IHC         | C1QA            | Rabbit polyclonal | Sigma Aldrich, Taufkirchen, Germany                | 1:100        | HPA002350    |
| IHC         | CD163           | MRQ-26            | Cell Marque, Rocklin, CA, USA                      | 1:100        | 16311-15     |
| IHC         | CD4             | 4B12              | Dako                                               | Ready to use | IR649        |
| IHC         | CD8             | C8/144B           | Dako                                               | 1:100        | M7103        |
| IHC/WB      | CD274/PD-L1     | E1L3N             | Cell Signaling Technology, Leiden, The Netherlands | 1:50         | #13684       |
| IHC         | MYC             | Y69               | Abcam, Cambridge, UK                               | 1:100        | Ab32072      |
| WB          | MYC             | D84C12            | Cell Signaling                                     | 1:1000       | #5605S       |
| WB          | ACTB            | AC-74             | Sigma-Aldrich, St Louis, USA                       | 1:20000      | A2228        |
| WB          | Anti-rabbit-HRP | Goat polyclonal   | Dako                                               | 1:2000       | P0448        |
| WB          | Anti-mouse-HRP  | Goat polyclonal   | Dako                                               | 1:10000      | P0447        |
